## Erratum: Drug-Targeted Inhibition of Peroxisome Proliferator-Activated Receptor-gamma Enhances the Chemopreventive Effect of Anti-Estrogen Therapy

Hongyan Yuan<sup>1</sup>, Levy Kopelovich<sup>2</sup>, Yuzhi Yin<sup>1,3</sup>, Jin Lu<sup>1</sup> and Robert I. Glazer<sup>1</sup>

<sup>1</sup> Department of Oncology, Georgetown University School of Medicine, and Lombardi Comprehensive Cancer Center, Washington, DC

<sup>2</sup> Chemoprevention Branch, National Cancer Institute, Bethesda, MD

<sup>3</sup> Laboratory of Allergic Diseases, National Institute of Allergy and Infectious Diseases, Bethesda, MD

**Published:** September 18, 2018

**Copyright:** Yuan et al. This is an open-access article distributed under the terms of the Creative Commons Attribution License 3.0 (CC BY 3.0), which permits unrestricted use, distribution, and reproduction in any medium, provided the original author and source are credited.

**This article has been corrected:** During production, the ending page number for this article was listed incorrectly. The page count has now been adjusted to show the proper pagination.

Original article: Oncotarget. 2012; 3:345-356. <https://doi.org/10.18632/oncotarget.457>
